# Supplementary material
Source: PubMed Central journal article supplement (PMC5826892)
Supplement: NIHMS936682-supplement-supplemental.pdf [file NIHMS936682-supplement-supplemental.pdf]

Table S1 Baseline characteristics by cause of rehospitalization group

| Characteristic <sup>a</sup>     | Rehospitalization status     |                                |                               |                          |                            |                           |
|---------------------------------|------------------------------|--------------------------------|-------------------------------|--------------------------|----------------------------|---------------------------|
|                                 | All non-HF re hosp (n = 406) | Early non-HF re hosp (n = 140) | Late non-HF re hosp (n = 266) | All HF re hosp (n = 345) | Early HF re hosp (n = 108) | Late HF re hosp (n = 237) |
| <b>Demographics</b>             |                              |                                |                               |                          |                            |                           |
| Age, years                      | 68 ± 14.1                    | 68 ± 14.3                      | 67 ± 14.0                     | 65 ± 15.2                | 65 ± 14.8                  | 65 ± 15.4                 |
| Female gender                   | 145 (35.7%)                  | 50 (35.7%)                     | 95 (35.7%)                    | 113 (32.8%)              | 33 (30.6%)                 | 80 (33.8%)                |
| Race groups                     |                              |                                |                               |                          |                            |                           |
| White                           | 256 (63.1%)                  | 81 (57.9%)                     | 175 (65.8%)                   | 196 (56.8%)              | 69 (63.9%)                 | 127 (53.6%)               |
| Black or African American       | 74 (18.2%)                   | 31 (22.1%)                     | 43 (16.2%)                    | 95 (27.5%)               | 23 (21.3%)                 | 72 (30.4%)                |
| Asian                           | 61 (15.0%)                   | 20 (14.3%)                     | 41 (15.4%)                    | 45 (13.0%)               | 11 (10.2%)                 | 34 (14.3%)                |
| Other                           | 15 (3.7%)                    | 8 (5.7%)                       | 7 (2.6%)                      | 9 (2.6%)                 | 5 (4.6%)                   | 4 (1.7%)                  |
| Baseline weight, kg             | 82 (68–97)                   | 82 (69–103)                    | 83 (68–95)                    | 83 (69–100)              | 84 (69–100)                | 83 (69–100)               |
| Region                          |                              |                                |                               |                          |                            |                           |
| Asia-Pacific                    | 60 (14.8%)                   | 19 (13.6%)                     | 41 (15.4%)                    | 45 (13.0%)               | 12 (11.1%)                 | 33 (13.9%)                |
| Central Europe                  | 15 (3.7%)                    | 4 (2.9%)                       | 11 (4.1%)                     | 10 (2.9%)                | 1 (0.9%)                   | 9 (3.8%)                  |
| Latin America                   | 27 (6.7%)                    | 11 (7.9%)                      | 16 (6.0%)                     | 26 (7.5%)                | 7 (6.5%)                   | 19 (8.0%)                 |
| North America                   | 282 (69.5%)                  | 101 (72.1%)                    | 181 (68.0%)                   | 252 (73.0%)              | 83 (76.9%)                 | 169 (71.3%)               |
| Western Europe                  | 22 (5.4%)                    | 5 (3.6%)                       | 17 (6.4%)                     | 12 (3.5%)                | 5 (4.6%)                   | 7 (3.0%)                  |
| <b>Medical history</b>          |                              |                                |                               |                          |                            |                           |
| NYHA classification             |                              |                                |                               |                          |                            |                           |
| NYHA class not assessed         | 83 (20.4%)                   | 33 (23.6%)                     | 50 (18.8%)                    | 67 (19.4%)               | 28 (25.9%)                 | 39 (16.5%)                |
| I                               | 11 (2.7%)                    | 3 (2.1%)                       | 8 (3.0%)                      | 6 (1.7%)                 | 1 (0.9%)                   | 5 (2.1%)                  |
| II                              | 64 (15.8%)                   | 17 (12.1%)                     | 47 (17.7%)                    | 47 (13.6%)               | 14 (13.0%)                 | 33 (13.9%)                |
| III                             | 164 (40.4%)                  | 61 (43.6%)                     | 103 (38.7%)                   | 148 (42.9%)              | 44 (40.7%)                 | 104 (43.9%)               |
| IV                              | 84 (20.7%)                   | 26 (18.6%)                     | 58 (21.8%)                    | 77 (22.3%)               | 21 (19.4%)                 | 56 (23.6%)                |
| Ischaemic heart disease         | 252 (62.1%)                  | 84 (60.0%)                     | 168 (63.2%)                   | 221 (64.1%)              | 79 (73.1%)                 | 142 (59.9%)               |
| HF hospitalization in past year | 207 (51.0%)                  | 70 (50.0%)                     | 137 (51.5%)                   | 210 (60.9%)              | 64 (59.3%)                 | 146 (61.6%)               |

|                                                 |                    |                    |                    |                    |                    |                    |
|-------------------------------------------------|--------------------|--------------------|--------------------|--------------------|--------------------|--------------------|
| LVEF, previous 12 months                        | 32 ± 15.0          | 34 ± 16.0          | 32 ± 14.4          | 30 ± 13.8          | 31 ± 14.2          | 29 ± 13.6          |
| LVEF <40% in past year                          | 240 (70.4%)        | 74 (63.8%)         | 166 (73.8%)        | 220 (78.6%)        | 67 (75.3%)         | 153 (80.1%)        |
| History of hypertension                         | 313 (77.1%)        | 115 (82.1%)        | 198 (74.4%)        | 276 (80.0%)        | 87 (80.6%)         | 189 (79.7%)        |
| History of diabetes mellitus                    | 203 (50.0%)        | 70 (50.0%)         | 133 (50.0%)        | 176 (51.0%)        | 54 (50.0%)         | 122 (51.5%)        |
| History of coronary artery disease              | 236 (58.3%)        | 80 (57.1%)         | 156 (58.9%)        | 218 (63.2%)        | 78 (72.2%)         | 140 (59.1%)        |
| History of cerebrovascular disease              | 73 (18.0%)         | 24 (17.1%)         | 49 (18.4%)         | 59 (17.1%)         | 14 (13.0%)         | 45 (19.0%)         |
| History of peripheral arterial vascular disease | 62 (15.3%)         | 24 (17.1%)         | 38 (14.3%)         | 47 (13.6%)         | 17 (15.7%)         | 30 (12.7%)         |
| Baseline chronic respiratory disease            | 108 (26.6%)        | 41 (29.3%)         | 67 (25.2%)         | 83 (24.1%)         | 28 (25.9%)         | 55 (23.2%)         |
| History of atrial fibrillation/flutter          | 182 (44.8%)        | 72 (51.4%)         | 110 (41.4%)        | 153 (44.3%)        | 46 (42.6%)         | 107 (45.1%)        |
| History of ICD/CRT                              | 65 (16.0%)         | 19 (13.6%)         | 46 (17.3%)         | 62 (18.0%)         | 19 (17.6%)         | 43 (18.1%)         |
| Current smoker                                  | 57 (14.0%)         | 22 (15.7%)         | 35 (13.2%)         | 45 (13.0%)         | 9 (8.3%)           | 36 (15.2%)         |
| <b>Laboratory values</b>                        |                    |                    |                    |                    |                    |                    |
| Baseline systolic BP, mmHg                      | 122 (110–137)      | 124 (111–140)      | 122 (110–136)      | 120 (109–136)      | 121 (108–135)      | 120 (109–138)      |
| Baseline diastolic BP, mmHg                     | 71 (64–81)         | 75 (65–86)         | 70 (64–80)         | 72 (63–80)         | 71 (63–80)         | 72 (64–81)         |
| Baseline heart rate, b.p.m.                     | 82 (70–95)         | 80 (70–94)         | 82 (70–96)         | 80 (70–90)         | 80 (70–90)         | 80 (70–90)         |
| Baseline respiratory rate, breaths/min          | 22 (20–24)         | 22 (21–24)         | 22 (20–24)         | 23 (20–25)         | 22 (20–25)         | 23 (21–25)         |
| Baseline sodium, mmol/L                         | 139 (136–141)      | 138 (136–141)      | 139 (136–141)      | 139 (136–141)      | 138 (136–141)      | 139 (136–141)      |
| Baseline BUN, mg/dL                             | 27 (19–40)         | 27 (19–41)         | 27 (20–39)         | 29 (20–43)         | 28 (18–42)         | 29 (20–44)         |
| Baseline creatinine, mg/dL                      | 1.3 (1.0–1.6)      | 1.4 (1.1–1.8)      | 1.3 (1.0–1.6)      | 1.4 (1.1–1.9)      | 1.4 (1.1–1.8)      | 1.4 (1.1–1.9)      |
| Baseline haemoglobin, g/dL                      | 12 (11–14)         | 12 (11–14)         | 13 (11–14)         | 12 (11–13)         | 12 (11–13)         | 12 (11–14)         |
| Baseline NT-proBNP, pg/mL                       | 4913 (2532–10 265) | 5263 (2128–10 252) | 4878 (2671–10 595) | 6555 (3487–13 792) | 8370 (3881–15 008) | 6196 (2965–13 612) |
| Baseline BNP, pg/mL                             | 1070 (647–1757)    | 1027 (601–1570)    | 1110 (655–1759)    | 1306 (656–2315)    | 992 (619–2530)     | 1429 (710–2275)    |
| Baseline GFR                                    | 55 (43–72)         | 54 (38–69)         | 57 (44–73)         | 52 (37–67)         | 53 (40–66)         | 52 (37–67)         |
| <b>Medication at/before baseline</b>            |                    |                    |                    |                    |                    |                    |
| ACEI or ARB                                     | 255 (62.8%)        | 85 (60.7%)         | 170 (63.9%)        | 227 (65.8%)        | 76 (70.4%)         | 151 (63.7%)        |
| Beta-blockers                                   | 269 (66.3%)        | 93 (66.4%)         | 176 (66.2%)        | 248 (71.9%)        | 71 (65.7%)         | 177 (74.7%)        |
| MRA                                             | 112 (27.6%)        | 34 (24.3%)         | 78 (29.3%)         | 109 (31.6%)        | 33 (30.6%)         | 76 (32.1%)         |
| Chronic use of loop diuretics                   | 307 (75.6%)        | 104 (74.3%)        | 203 (76.3%)        | 296 (85.8%)        | 91 (84.3%)         | 205 (86.5%)        |

|                              |                  |                  |                  |                  |                  |                  |
|------------------------------|------------------|------------------|------------------|------------------|------------------|------------------|
| Nitrates                     | 94 (23.2%)       | 39 (27.9%)       | 55 (20.7%)       | 106 (30.7%)      | 38 (35.2%)       | 68 (28.7%)       |
| Hydralazine                  | 50 (12.3%)       | 25 (17.9%)       | 25 (9.4%)        | 61 (17.7%)       | 17 (15.7%)       | 44 (18.6%)       |
| Digoxin                      | 110 (27.1%)      | 30 (21.4%)       | 80 (30.1%)       | 109 (31.6%)      | 27 (25.0%)       | 82 (34.6%)       |
| Oral anticoagulants          | 139 (34.2%)      | 45 (32.1%)       | 94 (35.3%)       | 118 (34.2%)      | 37 (34.3%)       | 81 (34.2%)       |
| Aspirin                      | 229 (56.4%)      | 76 (54.3%)       | 153 (57.5%)      | 202 (58.6%)      | 68 (63.0%)       | 134 (56.5%)      |
| <b>Clinical profile</b>      |                  |                  |                  |                  |                  |                  |
| Baseline BMI                 | 28.7 (24.6–33.2) | 29.1 (24.7–34.8) | 28.5 (24.6–33.1) | 29.0 (25.0–33.6) | 28.5 (25.1–33.8) | 29.2 (25.0–33.3) |
| Orthopnoea                   | 326 (80.5%)      | 120 (85.7%)      | 206 (77.7%)      | 282 (81.7%)      | 92 (85.2%)       | 190 (80.2%)      |
| Rales >1/3 lung fields       | 202 (49.8%)      | 68 (48.6%)       | 134 (50.4%)      | 169 (49.0%)      | 48 (44.4%)       | 121 (51.1%)      |
| JVD                          | 256 (63.1%)      | 90 (64.3%)       | 166 (62.4%)      | 232 (67.2%)      | 68 (63.0%)       | 164 (69.2%)      |
| Peripheral oedema            | 312 (76.8%)      | 109 (77.9%)      | 203 (76.3%)      | 272 (78.8%)      | 81 (75.0%)       | 191 (80.6%)      |
| <b>Clinical course</b>       |                  |                  |                  |                  |                  |                  |
| Actual treatment group       |                  |                  |                  |                  |                  |                  |
| Placebo                      | 204 (50.9%)      | 73 (52.9%)       | 131 (49.8%)      | 166 (49.3%)      | 50 (46.3%)       | 116 (50.7%)      |
| Nesiritide                   | 197 (49.1%)      | 65 (47.1%)       | 132 (50.2%)      | 171 (50.7%)      | 58 (53.7%)       | 113 (49.3%)      |
| Readmission reason           |                  |                  |                  |                  |                  |                  |
| Rehosp due to WHF            | 0 (0.0%)         | 0 (0.0%)         | 0 (0.0%)         | 345 (100.0%)     | 108 (100.0%)     | 237 (100.0%)     |
| Rehosp due to MI             | 8 (2.5%)         | 4 (3.0%)         | 4 (2.1%)         | 0 (0.0%)         | 0 (0.0%)         | 0 (0.0%)         |
| Rehosp due to RSCD           | 2 (0.6%)         | 2 (1.5%)         | 0 (0.0%)         | 0 (0.0%)         | 0 (0.0%)         | 0 (0.0%)         |
| Rehosp due to other CV event | 99 (30.5%)       | 49 (36.3%)       | 50 (26.3%)       | 0 (0.0%)         | 0 (0.0%)         | 0 (0.0%)         |
| Rehosp due to non-CV event   | 216 (66.5%)      | 80 (59.3%)       | 136 (71.6%)      | 0 (0.0%)         | 0 (0.0%)         | 0 (0.0%)         |

ACEI, angiotensin-converting enzyme inhibitor; ARB, angiotensin receptor blocker; BMI, body mass index; BNP, b-type natriuretic

peptide; BP, blood pressure; BUN, blood urea nitrogen; CV, cardiovascular; GFR, glomerular filtration rate; HF, heart failure;

ICD/CRT, implantable cardioverter defibrillator/cardiac resynchronization therapy; JVD, jugular venous distension; LVEF, left

ventricular ejection fraction; MI, myocardial infarction; MRA, mineralocorticoid receptor antagonist; NT-proBNP, N terminal pro

brain natriuretic peptide; NYHA, New York Heart Association; RSCD, resuscitated sudden cardiac death; WHF, worsening heart failure.

<sup>a</sup>Physical and laboratory findings, median (interquartile range).

**Commented [WS1]:** Author: check extension of RSCD is correct

Table S2 Discharge characteristics by timing and cause of 30-day rehospitalization

| Discharge characteristic                                                              | All non-HF rehos<br>(n = 354) | Early non-HF rehos<br>(n = 114) | Late non-HF rehos<br>(n = 240) | All HF rehos<br>(n = 308) | Early HF rehos<br>(n = 94) | Late HF rehos<br>(n = 214) |
|---------------------------------------------------------------------------------------|-------------------------------|---------------------------------|--------------------------------|---------------------------|----------------------------|----------------------------|
| <b>Discharge physical and laboratory findings, median (interquartile range) [xxx]</b> |                               |                                 |                                |                           |                            |                            |
| Systolic BP, mmHg                                                                     | 117 (105–130) [262]           | 120 (105–135) [87]              | 115 (106–130) [175]            | 115 (103–130) [224]       | 110 (98–135) [67]          | 116 (105–127) [157]        |
| Diastolic BP, mmHg                                                                    | 68 (60–76) [262]              | 68 (61–77) [87]                 | 68 (60–75) [175]               | 70 (61–76) [224]          | 69 (61–76) [67]            | 70 (61–76) [157]           |
| Weight, kg                                                                            | 81 (66–94) [240]              | 80 (66–97) [78]                 | 83 (67–93) [162]               | 81 (70–97) [206]          | 83 (70–99) [60]            | 81 (70–97) [146]           |
| Heart rate, b.p.m.                                                                    | 75 (69–84) [261]              | 73 (69–86) [87]                 | 75 (69–84) [174]               | 77 (68–85) [224]          | 75 (68–85) [67]            | 78 (68–84) [157]           |
| Respiratory rate, breaths/min                                                         | 20 (18–20) [244]              | 20 (18–20) [81]                 | 20 (18–20) [163]               | 20 (18–20) [212]          | 20 (18–20) [62]            | 20 (18–20) [150]           |
| Sodium, mg/dL                                                                         | 137 (134–140) [277]           | 138 (134–140) [87]              | 137 (135–139) [190]            | 138 (135–140) [251]       | 137 (135–140) [73]         | 138 (135–140) [178]        |
| Potassium, mmol/L                                                                     | 4.10 (3.80–4.40) [278]        | 4.10 (3.70–4.50) [87]           | 4.20 (3.80–4.40) [191]         | 4.10 (3.80–4.50) [251]    | 4.10 (3.80–4.60) [73]      | 4.10 (3.73–4.50) [178]     |
| BUN, mmol/L                                                                           | 11 (8–15) [275]               | 11 (8–16) [85]                  | 11 (8–15) [190]                | 12 (9–17) [252]           | 13 (9–19) [75]             | 12 (8–16) [177]            |
| Log of BUN, mmol/L                                                                    | 2.4 (2.1–2.7) [275]           | 2.4 (2.0–2.8) [85]              | 2.4 (2.1–2.7) [190]            | 2.5 (2.1–2.8) [252]       | 2.5 (2.2–3.0) [75]         | 2.5 (2.1–2.8) [177]        |
| Creatinine, mmol/L                                                                    | 115 (91–150) [282]            | 124 (88–166) [91]               | 115 (93–143) [191]             | 125 (104–176) [256]       | 133 (106–171) [77]         | 124 (103–177) [179]        |
| Creatinine, mg                                                                        | 1.30 (1.03–1.70) [282]        | 1.40 (1.00–1.88) [91]           | 1.30 (1.05–1.62) [191]         | 1.41 (1.18–1.98) [255]    | 1.50 (1.20–1.94) [77]      | 1.40 (1.16–2.00) [178]     |
| <b>Medications at discharge, %</b>                                                    |                               |                                 |                                |                           |                            |                            |
| ACEI or ARB                                                                           | 273/354 (77.1%)               | 85/114 (74.6%)                  | 188/240 (78.3%)                | 207/308 (67.2%)           | 66/94 (70.2%)              | 141/214 (65.9%)            |
| Beta-blocker                                                                          | 275/354 (77.7%)               | 95/114 (83.3%)                  | 180/240 (75.0%)                | 257/308 (83.4%)           | 78/94 (83.0%)              | 179/214 (83.6%)            |
| MRA                                                                                   | 147/354 (41.5%)               | 49/114 (43.0%)                  | 98/240 (40.8%)                 | 120/308 (39.0%)           | 40/94 (42.6%)              | 80/214 (37.4%)             |
| Oral or topical nitrates                                                              | 94/354 (26.6%)                | 41/114 (36.0%)                  | 53/240 (22.1%)                 | 100/308 (32.5%)           | 40/94 (42.6%)              | 60/214 (28.0%)             |
| Digoxin                                                                               | 115/354 (32.5%)               | 29/114 (25.4%)                  | 86/240 (35.8%)                 | 93/308 (30.2%)            | 25/94 (26.6%)              | 68/214 (31.8%)             |
| Inotropes                                                                             | 0/354 (0.0%)                  | 0/114 (0.0%)                    | 0/240 (0.0%)                   | 0/308 (0.0%)              | 0/94 (0.0%)                | 0/214 (0.0%)               |
| Loop diuretics                                                                        | 335/354 (94.6%)               | 109/114 (95.6%)                 | 226/240 (94.2%)                | 281/308 (91.2%)           | 84/94 (89.4%)              | 197/214 (92.1%)            |
| Oral anticoagulants                                                                   | 132/354 (37.3%)               | 38/114 (33.3%)                  | 94/240 (39.2%)                 | 112/308 (36.4%)           | 33/94 (35.1%)              | 79/214 (36.9%)             |
| Aspirin                                                                               | 241/354 (68.1%)               | 82/114 (71.9%)                  | 159/240 (66.3%)                | 212/308 (68.8%)           | 74/94 (78.7%)              | 138/214 (64.5%)            |
| <b>Discharge time</b>                                                                 |                               |                                 |                                |                           |                            |                            |
| Days from randomization to discharge                                                  | 5.0 (4.0–8.0) [354]           | 5.0 (4.0–8.0) [114]             | 5.0 (4.0–7.5) [240]            | 5.0 (3.0–7.0) [308]       | 5.0 (4.0–7.0) [94]         | 5.0 (3.0–7.0) [214]        |

Commented [WS2]: Author: please explain numbers in []

ACEI, angiotensin-converting enzyme inhibitor; ARB, angiotensin receptor blocker; BP, blood pressure; BUN, blood urea nitrogen;

HF, heart failure; MRA, mineralocorticoid receptor antagonist.

Table S3 Baseline patient characteristics by exclusion status

| Characteristic <sup>a</sup>                     | Exclusion status           |                                |                            | P value |
|-------------------------------------------------|----------------------------|--------------------------------|----------------------------|---------|
|                                                 | All patients<br>(n = 7143) | Excluded patients<br>(n = 559) | Study cohort<br>(n = 6584) |         |
| <b>Demographics</b>                             |                            |                                |                            |         |
| Age, years                                      | 65 ± 14.1                  | 66 ± 14.6                      | 65 ± 14.1                  | 0.489   |
| Female gender                                   | 2444 (34.2%)               | 189 (33.8%)                    | 2255 (34.3%)               | 0.830   |
| Race groups                                     |                            |                                |                            | 0.001   |
| White                                           | 3989 (55.9%)               | 313 (56.0%)                    | 3676 (55.9%)               |         |
| Black or African American                       | 1077 (15.1%)               | 59 (10.6%)                     | 1018 (15.5%)               |         |
| Asian                                           | 1767 (24.7%)               | 167 (29.9%)                    | 1600 (24.3%)               |         |
| Other                                           | 307 (4.3%)                 | 20 (3.6%)                      | 287 (4.4%)                 |         |
| Baseline weight, kg                             | 78 (64, 95)                | 75 (63, 92)                    | 78 (65, 95)                | 0.003   |
| Baseline height, cm                             | 168 (160, 175)             | 168 (160, 174)                 | 168 (160, 175)             | 0.147   |
| Region                                          |                            |                                |                            | <0.001  |
| Asia-Pacific                                    | 1762 (24.7%)               | 166 (29.7%)                    | 1596 (24.2%)               |         |
| Central Europe                                  | 967 (13.5%)                | 67 (12.0%)                     | 900 (13.7%)                |         |
| Latin America                                   | 665 (9.3%)                 | 55 (9.8%)                      | 610 (9.3%)                 |         |
| North America                                   | 3243 (45.4%)               | 198 (35.4%)                    | 3045 (46.3%)               |         |
| Western Europe                                  | 504 (7.1%)                 | 73 (13.1%)                     | 431 (6.5%)                 |         |
| <b>Medical history</b>                          |                            |                                |                            |         |
| NYHA classification                             |                            |                                |                            | <0.001  |
| NYHA class not assessed                         | 1250 (17.5%)               | 86 (15.4%)                     | 1164 (17.7%)               |         |
| I                                               | 255 (3.6%)                 | 7 (1.3%)                       | 248 (3.8%)                 |         |
| II                                              | 1098 (15.4%)               | 73 (13.1%)                     | 1025 (15.6%)               |         |
| III                                             | 2853 (39.9%)               | 203 (36.3%)                    | 2650 (40.2%)               |         |
| IV                                              | 1687 (23.6%)               | 190 (34.0%)                    | 1497 (22.7%)               |         |
| Ischaemic heart disease                         | 4293 (60.1%)               | 327 (58.6%)                    | 3966 (60.3%)               | 0.444   |
| History of hypertension                         | 5150 (72.1%)               | 370 (66.2%)                    | 4780 (72.6%)               | 0.001   |
| History of diabetes mellitus                    | 3046 (42.7%)               | 239 (42.8%)                    | 2807 (42.6%)               | 0.960   |
| History of coronary artery disease              | 3904 (54.7%)               | 299 (53.5%)                    | 3605 (54.8%)               | 0.554   |
| Current smoker                                  | 963 (13.5%)                | 62 (11.1%)                     | 901 (13.7%)                | 0.037   |
| History of cerebrovascular disease              | 842 (11.8%)                | 67 (12.0%)                     | 775 (11.8%)                | 0.882   |
| History of peripheral arterial vascular disease | 740 (10.4%)                | 42 (7.5%)                      | 698 (10.6%)                | 0.021   |
| Baseline chronic respiratory disease            | 1178 (16.5%)               | 88 (15.7%)                     | 1090 (16.6%)               | 0.616   |

| Characteristic <sup>a</sup>            | Exclusion status           |                                |                            | P value |
|----------------------------------------|----------------------------|--------------------------------|----------------------------|---------|
|                                        | All patients<br>(n = 7143) | Excluded patients<br>(n = 559) | Study cohort<br>(n = 6584) |         |
| History of atrial fibrillation/flutter | 2674 (37.4%)               | 206 (36.9%)                    | 2468 (37.5%)               | 0.762   |
| History of ICD/CRT                     | 640 (9.0%)                 | 57 (10.2%)                     | 583 (8.9%)                 | 0.287   |
| HF hospitalization in past year        | 2785 (39.0%)               | 252 (45.2%)                    | 2533 (38.5%)               | 0.002   |
| LVEF in previous 12 months             | 30 ± 12.9                  | 29 ± 13.5                      | 30 ± 12.8                  | 0.018   |
| LVEF <40% in past year                 | 4314 (80.2%)               | 325 (81.0%)                    | 3989 (80.1%)               | 0.647   |
| <b>Laboratory values</b>               |                            |                                |                            |         |
| Baseline sodium, mmol/L                | 139 (136–141)              | 138 (134, 140)                 | 139 (136–141)              | <0.001  |
| Baseline potassium, mmol/L             | 4.1 (3.7–4.5)              | 4.2 (3.7–4.5)                  | 4.1 (3.7–4.4)              | 0.033   |
| Baseline BUN, mg/dL                    | 25 (18–39)                 | 29 (20–48)                     | 25 (18–38)                 | <0.001  |
| Baseline creatinine, mg/dL             | 1.2 (1.0–1.6)              | 1.3 (1.0–1.7)                  | 1.2 (1.0–1.6)              | <0.001  |
| Baseline haemoglobin, g/dL             | 13 (11–14)                 | 12 (11–14)                     | 13 (11–14)                 | 0.018   |
| Baseline NT-proBNP, pg/mL              | 4501 (2098–9177)           | 6743 (3177–11864)              | 4347 (2040–8973)           | <0.001  |
| Baseline BNP, pg/mL                    | 990 (544–1850)             | 1187 (631–2072)                | 985 (541–1825)             | 0.047   |
| Baseline RDW, %                        | 15 (14–17)                 | 16 (14–18)                     | 15 (14–17)                 | <0.001  |
| <b>Medication at/before baseline</b>   |                            |                                |                            |         |
| ACEI or ARB                            | 4340 (60.8%)               | 309 (55.4%)                    | 4031 (61.3%)               | 0.006   |
| Beta-blockers                          | 4158 (58.2%)               | 295 (52.9%)                    | 3863 (58.7%)               | 0.007   |
| MRA                                    | 1992 (27.9%)               | 160 (28.7%)                    | 1832 (27.8%)               | 0.671   |
| Chronic thiazide diuretics             | 474 (6.6%)                 | 40 (7.2%)                      | 434 (6.6%)                 | 0.597   |
| Nitrates                               | 1681 (23.5%)               | 137 (24.6%)                    | 1544 (23.5%)               | 0.559   |
| Digoxin                                | 1895 (26.5%)               | 166 (29.7%)                    | 1729 (26.3%)               | 0.074   |
| Oral anticoagulants                    | 1722 (24.1%)               | 133 (23.8%)                    | 1589 (24.1%)               | 0.871   |
| Aspirin                                | 3507 (49.1%)               | 257 (46.1%)                    | 3250 (49.4%)               | 0.132   |
| <b>Clinical profile</b>                |                            |                                |                            |         |
| Baseline BMI                           | 27.6 (23.8–32.6)           | 26.9 (23.1–31.4)               | 27.6 (23.8–32.7)           | 0.005   |
| Baseline SBP, mmHg                     | 123 (110–140)              | 119 (108–135)                  | 124 (110–140)              | <0.001  |
| Baseline DBP mmHg                      | 74 (66–83)                 | 72 (65–80)                     | 74 (67–84)                 | 0.004   |
| Baseline heart rate, b.p.m.            | 82 (72–95)                 | 82 (72–96)                     | 82 (72–95)                 | 0.414   |
| Baseline respiratory rate, breaths/min | 23 (21–26)                 | 24 (20–26)                     | 23 (21–26)                 | 0.343   |
| Orthopnoea                             | 5485 (76.9%)               | 426 (76.6%)                    | 5059 (76.9%)               | 0.867   |
| Rales >1/3 lung fields                 | 3734 (52.3%)               | 293 (52.4%)                    | 3441 (52.3%)               | 0.975   |
| JVD                                    | 4003 (56.1%)               | 311 (55.6%)                    | 3692 (56.1%)               | 0.819   |
| Peripheral oedema                      | 5330 (74.6%)               | 429 (76.7%)                    | 4901 (74.5%)               | 0.236   |

| Characteristic <sup>a</sup> | Exclusion status           |                                |                            | P value |
|-----------------------------|----------------------------|--------------------------------|----------------------------|---------|
|                             | All patients<br>(n = 7143) | Excluded patients<br>(n = 559) | Study cohort<br>(n = 6584) |         |
| <b>Clinical course</b>      |                            |                                |                            |         |
| Planned treatment group     |                            |                                |                            | 0.053   |
| Placebo                     | 3577 (50.1%)               | 302 (54.0%)                    | 3275 (49.8%)               |         |
| Nesiritide                  | 3564 (49.9%)               | 257 (46.0%)                    | 3307 (50.2%)               |         |
| Actual treatment group      |                            |                                |                            | 0.065   |
| Placebo                     | 3509 (50.1%)               | 276 (54.0%)                    | 3233 (49.8%)               |         |
| Nesiritide                  | 3498 (49.9%)               | 235 (46.0%)                    | 3263 (50.2%)               |         |

ACEI, angiotensin-converting enzyme inhibitor; ARB, angiotensin receptor blocker; BMI, body mass index; BNP, b-type natriuretic peptide; BUN, blood urea nitrogen; DBP, diastolic blood pressure; HF, heart failure; ICD/CRT, implantable cardioverter defibrillator/cardiac resynchronization therapy; JVD, jugular venous distension; LVEF, left ventricular ejection fraction; MRA, mineralocorticoid receptor antagonist; NT-proBNP, N terminal pro brain natriuretic peptide; NYHA, New York Heart Association; RDW, xxx; SBP, systolic blood pressure.

<sup>a</sup>Physical and laboratory findings, median (interquartile range).

Commented [WS3]: Author: insert extension of RDW
